# Supplementary material for: Intra-articular tracking of adipose-derived stem cells by chitosan-conjugated iron oxide nanoparticles in a rat osteoarthritis model
Source: RSC Adv. 2019 Apr 16;9(21):12010–9. doi: 10.1039/c8ra09570a (PMC9063530; doi:10.1039/c8ra09570a)
Supplement: RA-009-C8RA09570A-s001 [file RA-009-C8RA09570A-s001.pdf]

# Intra-articular tracking of adipose-derived stem cells by chitosan conjugated iron oxide nanoparticles in a rat osteoarthritis model

Meihua Xie,<sup>†a</sup> ShuLin Luo,<sup>†b</sup> Ying Li,<sup>†b</sup> Laiya Lu,<sup>b</sup> Cuijun Deng,<sup>a</sup> Yu Cheng<sup>\*a</sup> and Feng Yin<sup>\*b</sup>

<sup>a</sup> Shanghai East Hospital; The Institute for Biomedical Engineering & Nano Science, Tongji University School of Medicine, Shanghai, 200120, China; <sup>b</sup> Department of Joint Surgery, Shanghai East Hospital, School of Medicine, Tongji University, Shanghai, China; Corresponding authors: 001yinfeng@sina.com; yucheng@tongji.edu.cn

† The authors contributed equally to this work.

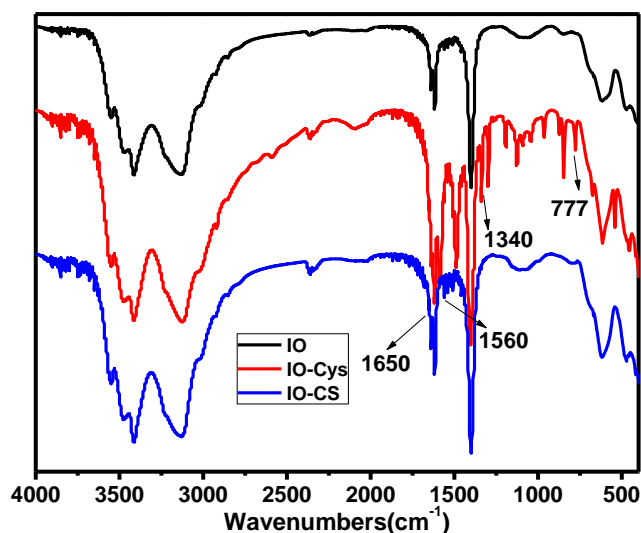

Figure S1. FTIR spectrum of IO, IO-Cys and IO-CS. The peak appeared at 777 cm<sup>-1</sup> was due to stretch of C-S after conjugation of cysteine on the surface of IO. -COOH group of cysteine appeared at 1340 cm<sup>-1</sup>[1]. C=O in amide group (amide I band) appeared at 1650 cm<sup>-1</sup> after modification of IO with chitosan. The peak at 1560 cm<sup>-1</sup> was attributed to NH-bending vibration in amide group[2].

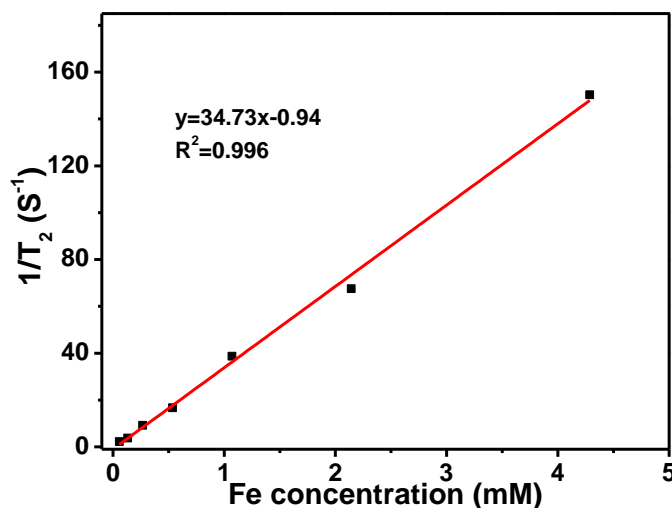

Figure S2. The linear fitting of  $1/T_2$  as a function of Fe concentration from 0-0.6 mM at 0.5 T NMR analyzing and imaging system.

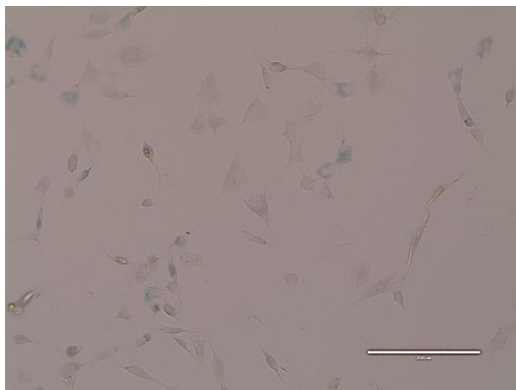

Figure S3. Prussian blue staining of ADSCs incubated with 50  $\mu\text{g/mL}$  ferumoxytol.

#### Reference

- [1] J. G. Parsons, K. M. Dokken, J. McClure, J. L. Gardea-Torresdey. *Polyhedron*. 2013;**56**:237-42.
- [2] A. Pawlak, M. Mucha, *Thermochimica Acta*. 2003;**396**:153-66.
